# Supplementary material for: The Parasite Load of Trypanosoma cruzi Modulates Feeding and Defecation Patterns of the Chagas Disease Vector Triatoma infestans
Source: Microorganisms. 2022 May 10;10(5):1003. doi: 10.3390/microorganisms10051003 (PMC9143535; doi:10.3390/microorganisms10051003)
Supplement: Supplementary file 1 [file microorganisms-10-01003-s001.zip › Table S1, Table S2, Table S4, Table S5 and Figure S1.pdf]

**Table S1.** Results of the Kolmogorov-Smirnov test for normality and the Levene test for homogeneity of variance, for each feeding and defecation behavioral variables studied, comparing *Trypanosoma cruzi* infected with non-infected *Triatoma infestans*.

|                           | Kolmogorov-Smirnov | Levene Test |
|---------------------------|--------------------|-------------|
| Host detection            | p<0.001            | p=0.136     |
| First approach            | p<0.001            | p=0.843     |
| Number of bites           | p<0.001            | p=0.054     |
| Feeding time              | p<0.001            | p=0.643     |
| Weight difference         | p<0.001            | p<0.001     |
| Dejection time            | p<0.001            | p=0.393     |
| Distance of the dejection | p<0.001            | p=0.404     |

**Table S2.** Results of the Mann-Whitney U test comparing each feeding and defecation behavioral variables studied between non-infected *T. infestans* fed *O. degus* and non-infected *T. infestans* control group.

|                           | Significance |
|---------------------------|--------------|
| Host detection            | p=0.305      |
| First approach            | p=0.712      |
| Number of bites           | p=0.423      |
| Feeding time              | p=0.415      |
| Weight difference         | p=0.969      |
| Dejection time            | p=0.380      |
| Distance of the dejection | p=0.838      |

**Table S4.** Results of the Kruskal-Wallis test comparing each feeding and defecation behavioral variables studied between nymphal instars (III, IV and V).

|                   | Statistic | Significance |
|-------------------|-----------|--------------|
| Parasite Load     | 2.651     | p=0.266      |
| Host detection    | 2.589     | p=0.274      |
| First approach    | 2.754     | p=0.241      |
| Number of bites   | 4.397     | p=0.111      |
| Feeding time      | 2.754     | p=0.252      |
| Weight difference | 58.685    | p<0.001*     |

|                           |       |         |
|---------------------------|-------|---------|
| Dejection time            | 5.931 | p=0.052 |
| Distance of the dejection | 0.714 | p=0.700 |

\*Dunn test: III-IV p<0.001; III-V p<0.001; IV-V p=0.299. p-values adjusted by the Bonferroni correction.

**Table S5.** Results of the Mann-Whitney U test comparing each feeding and defecation behavioral variable studied between the group of *T. infestans* infected with chronically infected *O. degus* and the group of *T. infestans* infected with acutely infected *M. musculus*.

|                           | Significance |
|---------------------------|--------------|
| Parasite Load             | P=0.730      |
| Host detection            | p=0.948      |
| First approach            | p=0.839      |
| Number of bites           | p=0.515      |
| Feeding time              | p=0.363      |
| Weight difference         | P<0.001      |
| Dejection time            | p=0.859      |
| Distance of the dejection | p=0.149      |

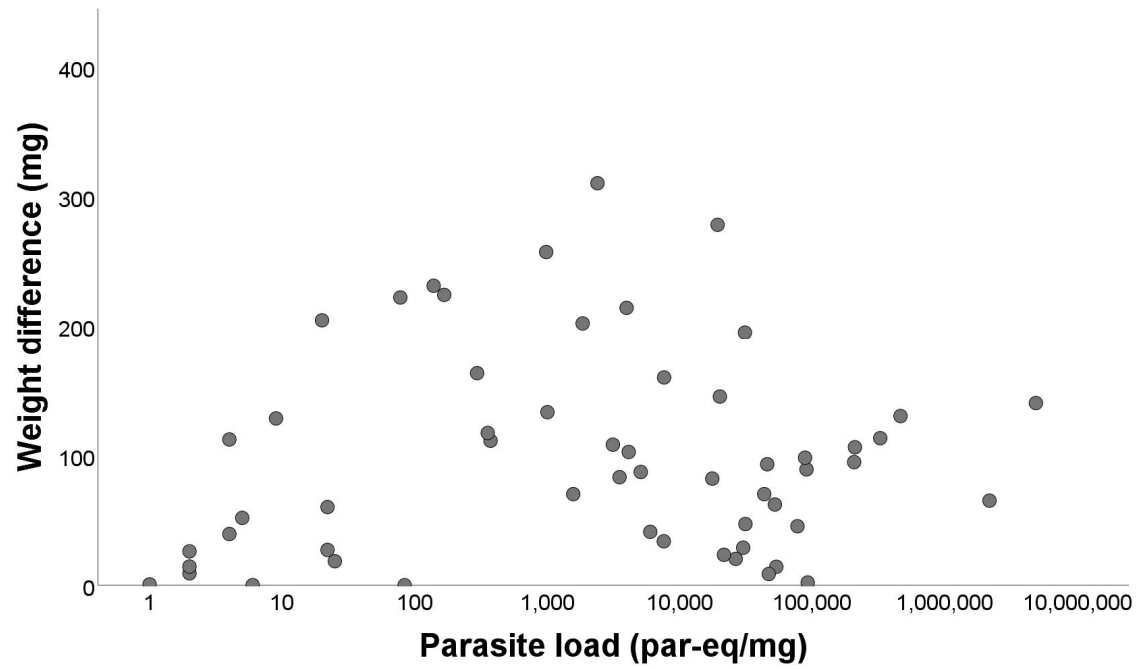

**Figure S1.** Weight difference of *Triatoma infestans* according to *Trypanosoma cruzi* parasite load. Parasite load ( $\text{LOG}_{10}$ ) in relation to Weight difference in milligrams. Weight difference is defined as the subtraction of the initial experimental weight from the final weight.
