# Supplementary material for: The Parasite Load of Trypanosoma cruzi Modulates Feeding and Defecation Patterns of the Chagas Disease Vector Triatoma infestans
Source: Microorganisms. 2022 May 10;10(5):1003. doi: 10.3390/microorganisms10051003 (PMC9143535; doi:10.3390/microorganisms10051003)
Supplement: Supplementary file 1 [file microorganisms-10-01003-s001.zip › Table S3 Compiled database.xlsx]

## Sheet: Individual_data
T. infestans	Nymphal	Host	Weight before feeding	Arena	Host detection	First approach	Number of bites	Feeding time	Dejection time	Dejection distance	Weight after feeding	Weight difference	qPCR T. cruzi DNA	qPCR T. cruzi DNA	qPCR T. infestans 18S DNA	qPCR T. infestans 18S DNA	Parasite load
ID	stage	species	mg	quadrant	seconds	seconds	events	seconds	seconds	centimetres	mg	mg	CT	(Par-eq/mL)	CT	(ng/uL)	Par-eq/mg DNA triatomine
1	V	Mus musculus	39	F	21	9	13	719	920	9.5	141.4	102.4	16.97	676.002	15.11	164.018	4121.5
2	V	Mus musculus	67	D	9	635	5	1141	1807	4.1	184	117	19.97	94.6128	14.37	266.052	355.6
3	V	Mus musculus	68	C	0	2	15	2577	178	1.2	91.3	23.3	17.56	701.201	17.55	32.5102	21568.6
4	V	Mus musculus	65	H	13	33	3	879	7	3.8	146.9	81.9	16.16	1149.56	16.5	65.3115	17601.1
5	V	Mus musculus	73	C	14	5	5	712	2863	2.9	201.2	128.2	25.4	2.70225	14.24	290.559	9.3
6	V	Mus musculus	63	A	35	25	1	850	630	3.6	267.4	204.4	29.42	0.409522	19.23	20.3051	20.1
7	V	Mus musculus	45	I	18	3	1	919	1179	0.7	178	133	18.15	313.063	14.13	311.803	1004
8	V	Mus musculus	63	A	16	11	10	347	439	4.2	110	47	19.77	307.775	19.36	9.83131	31305.5
9	V	Mus musculus	41	E	4	3	5	497	3095	7.3	204	163	19.09	177.298	14.34	599.34	295.8
10	V	Mus musculus	55	F	12	23	27	1000	446	10.9	250	195	12.05	17954.8	14.4	577.923	31067.8
11	V	Mus musculus	64	H	8	33	43	1123	258	11.6	170	106	14.29	4128.37	19.51	19.676	209817
12	V	Mus musculus	66	F	14	42	4	996	217	8.5	136	70	19.08	278.199	20.28	6.40188	43455.9
13	V	Mus musculus	96	C	2	8	1	630	382	2.1	189	93	15.63	1762.41	18.49	38.5777	45684.7
14	V	Mus musculus	78	H	20	17	3	1198	757	10.8	302	224	21.42	38.6229	15.78	231	167.1
15	V	Mus musculus	62	B	10	6	29	1518	177	4.1	340	278	14.18	4447.6	15.34	230.304	19311.8
16	V	Mus musculus	46	E	15	8	16	1077	2477	7.2	277	231	25.31	3.01637	19.36	21.6763	139.1
17	V	Mus musculus	60	D	26	5	1	475	708	11	130	70	20.43	74.0325	18.19	47.0372	1573.9
18	V	Mus musculus	50	A	4	7	22	314	222	7.1	190	140	14.33	4115.91	24.27	0.845559	4.86768e+06
19	V	Mus musculus	22	I	6	1070	8	956	673	3.8	130	108	16.76	815.156	15.6	260.114	3133.8
20	V	Mus musculus	104	A	35	27	8	1641	743	4.8	318	214	16.9	745.953	16.1	187.786	3972.3
21	V	Mus musculus	74	D	27	7	4	1355	1512	11.8	276	202	16.17	1203.93	14.22	649.899	1852.4
22	V	Mus musculus	67	I	13	7	1	605	401	3.1	129	62	12.02	18233.5	13.87	348.834	52269.9
23	V	Mus musculus	70	E	9	99	9	1221	738	0.4	380	310	17.26	590.791	15.69	246.515	2396.5
24	V	Mus musculus	52	E	8	14	9	614	1333	1.1	274	222	21.54	35.7042	14.76	455.948	78.3
25	V	Mus musculus	58	D	17	6	8	639	351	0.9	203	145	15	2653.7	15.78	132.166	20078.4
26	V	Mus musculus	33	H	31	5	1	3600	1255	7.1	290	257	16.71	864.513	12.92	879.218	983.2
27	III	Octodon degus	11.1	G	136	-	0	-	-	10.9	11.1	0	27.19	0.916143	16.05	165.859	5.5
28	III	Octodon degus	10	E	6	4	17	159	397	9.5	75	65	14.18	4844.13	17.19	2.22829	2.17393e+06
29	IV	Octodon degus	44	D	4	2	12	466	74	10.6	157	113	12.4	15513.6	15.13	47.6167	325802
30	IV	Octodon degus	31	E	24	4	8	893	2691	8.4	142	111	21.06	53.2856	13.47	142.479	373.9
31	IV	Octodon degus	23	H	23	6	1	348	759	4.6	110	87	16.6	887.658	13.16	174.674	5081.8
32	IV	Octodon degus	39	E	9	3	20	717	2	7.2	169	130	10.12	61821.1	12.72	133.409	463395
33	IV	Octodon degus	30	D	0	6	25	533	318	2.6	119	89	16.33	1057.93	15.01	11.6849	90538.6
34	IV	Octodon degus	29	D	156	3123	4	156	477	10.1	141	112	28.72	0.315236	15.22	87.3766	3.6
35	IV	Octodon degus	59	H	10	6	1	975	207	5.2	157	98	16.72	920.338	13.97	10.4202	88322.3
36	III	Octodon degus	28	A	11	6	9	754	166	9	42.1	14.1	15.85	1445.82	13.76	26.9899	53569.1
37	IV	Octodon degus	31	C	9	38	30	950	203	10.2	76.3	45.3	15.85	1447.8	15.55	18.7084	77387.5
38	III	Octodon degus	24	H	1	26	28	558	448	7.3	118.6	94.6	14.21	4244.27	15.44	20.4872	207167
39	IV	Octodon degus	42	H	8	13	10	857	2718	9.6	81.3	39.3	28.37	0.397098	15.04	103.405	3.8
40	III	Octodon degus	7	I	50	2875	1	2925	675	10.4	34.1	27.1	26.42	1.42636	13.64	65.1223	21.9
41	III	Octodon degus	26	E	4	6	10	481	1351	7.9	67	41	17.81	481.556	17.03	80.3178	5995.6
42	IV	Octodon degus	41	D	5	235	12	1769	895	6.2	200.7	159.7	18.09	401.654	13.98	52.6759	7625
43	III	Octodon degus	13	G	3	32	4	557	918	7.5	96	83	18.86	242.636	17.06	68.9584	3518.5
44	III	Octodon degus	6	B	38	9	7	1055	2497	8.2	32	26	29.7	0.198972	16.1	129.758	1.5
45	III	Octodon degus	9	C	18	15	3	751	1277	10.2	69	60	24.6	5.22787	10.99	238.368	21.9
46	III	Octodon degus	101	A	11	4	41	2841	306	6.2	109.6	8.6	14.29	4495.56	12.38	95.6703	46990.1
47	III	Octodon degus	8.7	E	26	13	5	1911	630	2.7	42.4	33.7	15.86	1506.67	11.43	198.686	7583.1
48	III	Octodon degus	2.8	F	98	6	15	1187	2226	10.6	11.9	9.1	28.88	0.315698	11.67	152.879	2
49	III	Octodon degus	14.2	H	3	19	2	193	972	-	28.5	14.3	29.48	0.212423	12	123.055	1.7
50	III	Octodon degus	10.7	I	0	21	20	1148	262	9.1	39.5	28.8	16.65	1956.49	12.97	64.9472	30124.2
51	III	Octodon degus	0.6	A	122	118	3	872	678	4.7	1.2	0.6	31.34	0.063167	12.12	113.578	0.8
52	III	Octodon degus	5.6	G	7	9	15	1440	57	11.4	7.6	2	12.33	16147.9	11.46	174.656	92455
53	III	Octodon degus	7.7	D	26	27	5	478	967	2.9	26.1	18.4	26.48	1.3276	16.81	53.2345	24.9
54	III	Octodon degus	7.7	H	12	91	16	539	228	6.1	27.9	20.2	16.89	712.266	17.84	26.9162	26462.3
55	III	Octodon degus	14.7	F	48	6	5	815	1345	3.5	66.4	51.7	28.78	0.294671	13.3	54.1523	5.4
56	III	Octodon degus	5.9	A	22	24	1	1525	2075	4.3	5.9	0	23.07	12.4701	15.26	147.73	84.4
57	III	Octodon degus	10	B	25	17	17	458	3085	10	67	57	no CT	0	13.71	121.292	0
58	III	Octodon degus	3	E	38	3	7	1721	1163	5.5	12	9	no CT	0	17.91	48.7731	0
59	III	Octodon degus	15	F	3	24	2	3063	509	8.7	70.3	55.3	no CT	0	13.79	115.745	0
60	III	Octodon degus	28	G	45	639	1	822	1026	0.2	168.4	140.4	no CT	0	13.62	129.401	0
61	IV	Octodon degus	14	G	53	4	8	1306	759	10.7	62	48	no CT	0	12.63	247.791	0
62	IV	Octodon degus	51	I	39	19	28	582	1311	-	112	61	no CT	0	12.44	282.473	0
63	IV	Octodon degus	30	F	19	10	1	448	3116	3.3	82	52	no CT	0	13.33	156.725	0
64	IV	Octodon degus	25	C	57	12	9	1044	924	-	47	22	no CT	0	14.03	98.6453	0
65	IV	Octodon degus	21	C	25	1	2	349	859	5.7	72.4	51.4	no CT	0	13.71	780.156	0
66	IV	Octodon degus	33	C	30	13	41	1096	507	2.6	103.5	70.5	no CT	0	15.27	278.131	0
67	III	Octodon degus	10	I	8	49	4	273	1050	9.2	38	28	no CT	0	15.44	200.852	0
68	IV	Octodon degus	39	A	15	6	5	675	1524	4.5	227	188	no CT	0	16.91	74.9633	0
69	III	Octodon degus	11	A	0	4	1	316	728	9.5	98	87	no CT	0	16.12	125.923	0
70	III	Octodon degus	5	B	14	3	2	930	1040	9.9	24	19	no CT	0	15.93	145.467	0
71	III	Octodon degus	17.5	B	0	8	5	978	2613	10.7	31.4	13.9	no CT	0	13.42	48.6242	0
72	III	Octodon degus	13.6	H	6	14	2	274	661	11.2	13.6	0	no CT	0	13.02	62.9584	0
73	III	Octodon degus	7	A	34	123	5	602	2760	4	14.1	7.1	no CT	0	11.9	131.605	0
74	III	Octodon degus	18	G	2	5	5	416	1041	10.4	35.2	17.2	no CT	0	11.7	149.343	0
75	III	Octodon degus	7.1	B	2	8	1	435	3154	4.7	15.9	8.8	no CT	0	15.42	200.981	0
76	III	Octodon degus	7.6	E	124	249	9	886	562	6.8	7.6	0	no CT	0	15.43	198.486	0
77	III	Octodon degus	5.5	E	51	22	8	589	1054	4.8	6.2	0.7	no CT	0	12.01	122.194	0
78	III	Octodon degus	8.8	C	0	14	36	2995	890	10.7	52.1	43.3	no CT	0	12.25	104.179	0
79	III	Octodon degus	8	I	28	27	1	556	2987	9.9	40.5	32.5	no CT	0	15.8	155.573	0
80	III	Octodon degus	11	I	42	7	8	589	831	9.9	22.4	11.4	no CT	0	15.69	111.73	0
81	III	Octodon degus	11	I	60	12	5	524	2303	1.7	39.6	28.6	no CT	0	15.82	102.397	0
82	III	Octodon degus	13	A	4	11	2	309	743	11.1	30.8	17.8	no CT	0	14.62	226.189	0
83	III	Mus musculus	7.1	F	2	1	2	320	713	8.9	61.6	54.5	no CT	0	11.76	88.1513	0
84	III	Mus musculus	8.4	C	29	17	3	672	2669	4	22.4	14	no CT	0	16.31	148.204	0
85	III	Mus musculus	9.5	G	54	2134	4	2134	1466	8	10.7	1.2	no CT	0	14.57	86.6106	0
86	III	Mus musculus	4	C	41	29	11	1538	289	7.5	19	15	no CT	0	14.03	117.07	0
87	III	Mus musculus	3.4	A	84	60	6	1072	2528	11.3	13.4	10	no CT	0	16.51	118.385	0
88	III	Mus musculus	10.2	F	174	-	0	-	-	9.1	10.2	0	no CT	0	15.18	151.621	0
89	III	Mus musculus	8.2	F	17	36	1	768	1189	4.3	49.7	41.5	no CT	0	16.64	28.5537	0
90	III	Mus musculus	6.3	B	196	-	0	-	-	10.3	6.3	0	no CT	0	12.36	138.17	0
91	III	Mus musculus	2.8	E	14	6	2	860	2715	6.8	25	22.2	no CT	0	13.07	52.2996	0
92	III	Mus musculus	10	A	37	12	3	748	610	8.1	13.2	12.4	no CT	0	14.92	100.032	0
93	III	Mus musculus	8	H	31	11	8	884	1013	9.7	62.7	54.7	no CT	0	15.89	129.727	0
94	III	Mus musculus	10.7	A	0	10	10	1104	851	6.4	68.7	58	no CT	0	13.48	23.943	0
95	III	Mus musculus	85	H	0	4	6	747	655	9.6	45.7	37.2	no CT	0	12.9	196.648	0
96	III	Mus musculus	12	G	10	12	18	113	3464	10.2	24	22.8	no CT	0	16.62	121.828	0
97	III	Mus musculus	12.7	B	35	29	4	1038	1682	5.5	83.6	70.9	no CT	0	12.9	159.007	0
98	III	Mus musculus	4.3	B	98	27	8	552	783	6.1	7	2.7	no CT	0	12.54	32.0013	0
99	III	Mus musculus	8.3	C	28	15	1	444	2035	4.5	27.6	19.3	no CT	0	16.25	88.9035	0
100	III	Mus musculus	14.8	B	33	3	1	2490	1110	5	68.4	53.6	no CT	0	14.8	73.7396	0
101	III	Mus musculus	11.8	E	43	3	5	817	767	7.8	71.8	60	no CT	0	13.88	78.1148	0
102	III	Mus musculus	12.7	G	50	7	2	108	2385	0.4	28.9	16.2	no CT	0	13.65	145.202	0
103	III	Mus musculus	7.6	C	11	9	1	404	814	11.2	12.4	4.8	no CT	0	12.21	85.3099	0
104	III	Mus musculus	4.2	A	9	7	3	400	3182	3.5	19.7	15.5	no CT	0	16.41	57.9952	0
105	III	Mus musculus	15	C	48	11	9	2023	790	11.9	25.9	10.9	no CT	0	13.13	62.0084	0
106	III	Mus musculus	12.3	A	7	11	6	487	1346	9	70.6	58.3	no CT	0	12.52	145.235	0
107	III	Mus musculus	10.5	H	49	3314	1	3600	286	4.9	37.7	27.2	no CT	0	13.21	17.1857	0
108	III	Mus musculus	6.2	G	9	78	10	875	1062	8.3	22.2	16	no CT	0	12.31	171.652	0

## Sheet: Arena quadrants
	A	B	C
	D	E	F
	G	H	I
